# Supplementary material
Source: Springer Nature journal article supplement (https://www.springermedizin.de/resource/supplementary/12967_2010_660_MOESM11_ESM.pdf/9577230)
Supplement: MOESM11 [file 9577230]

Extracellular Space

Plasma Membrane

Cytoplasm

Nucleus

unknown

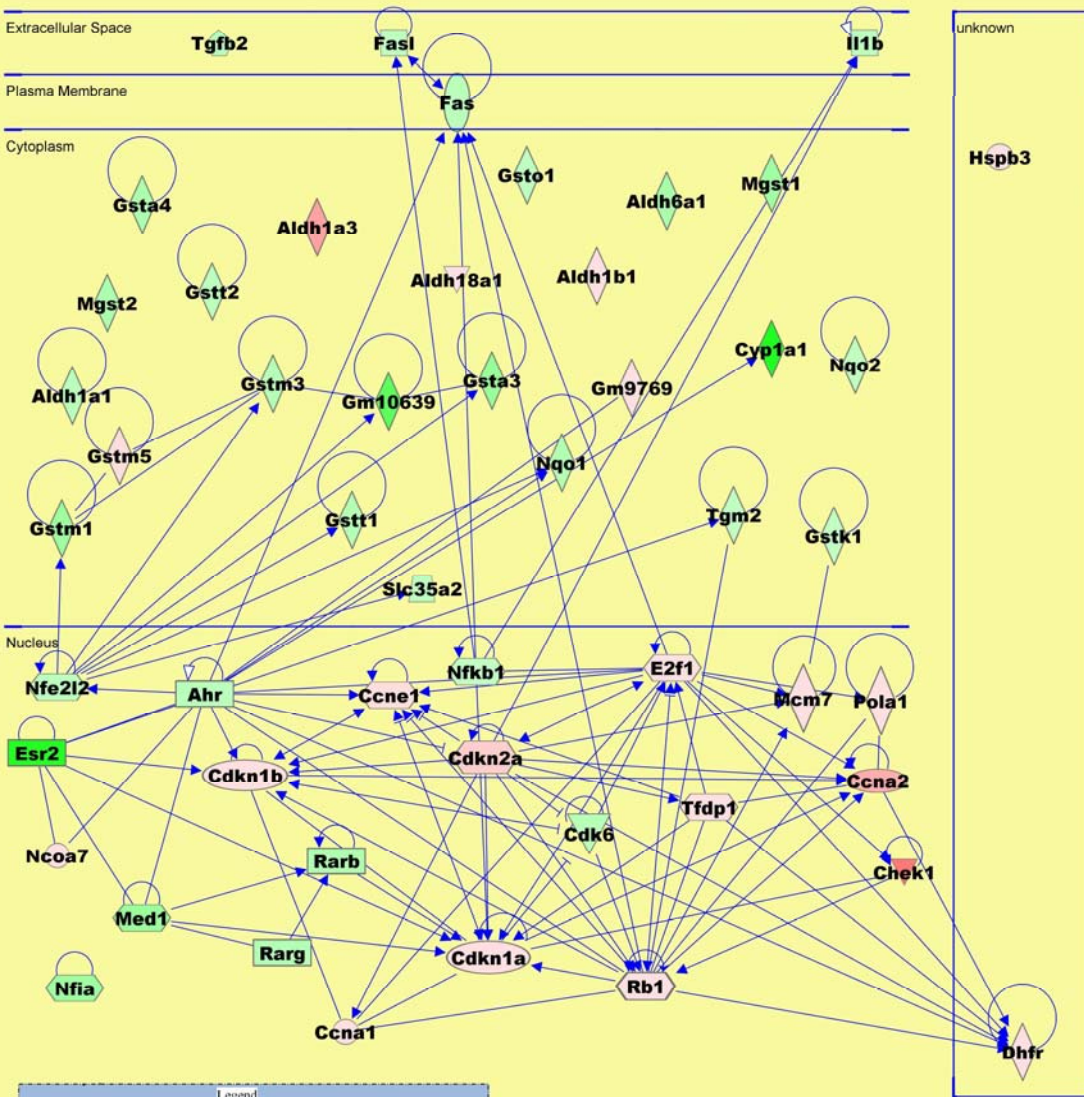

Legend

- Growth Factor
- Transcription Regulator
- Enzyme
- Transporter
- Ligand-dependent nuclear receptor
- Other
- Kinase
- Transmembrane Receptor
- Cytokine
- Relationship
